# Supplementary material for: Homozygous deletion of CDKN2A by fluorescence in situ hybridization is prognostic in grade 4, but not grade 2 or 3, IDH-mutant astrocytomas
Source: Springer Nature journal article supplement (doi:10.1186/s40478-020-01044-y), 2020-10-20
Supplement: MOESM1 [file 25667370]

**Supplementary Table S1: Cox Proportional Hazard Model for Primary Tumors with *CDKN2A* Loss as a Continuous Variable**

Hazard ratios:

Female Sex 0.524919  
 WHO Grade 1.661930  
 Age at Resection 1.028102  
 CDKN2A Homo Del 1.031800

|                        | coef  | exp(coef) | se(coef) | coef lower 95% | coef upper 95% | exp(coef) lower 95% | exp(coef) upper 95% | z     | p      | -log2(p) |
|------------------------|-------|-----------|----------|----------------|----------------|---------------------|---------------------|-------|--------|----------|
| <b>Sex</b>             | -0.64 | 0.52      | 0.34     | -1.31          | 0.02           | 0.27                | 1.02                | -1.89 | 0.06   | 4.10     |
| <b>Grade</b>           | 0.51  | 1.66      | 0.23     | 0.07           | 0.95           | 1.07                | 2.59                | 2.25  | 0.02   | 5.37     |
| <b>Age</b>             | 0.03  | 1.03      | 0.01     | 0.00           | 0.05           | 1.00                | 1.06                | 2.07  | 0.04   | 4.71     |
| <b>CDKN2A Homo Del</b> | 0.03  | 1.03      | 0.01     | 0.01           | 0.05           | 1.01                | 1.05                | 3.17  | <0.005 | 9.35     |

|                                  |               |
|----------------------------------|---------------|
| <b>Concordance</b>               | 0.69          |
| <b>Partial AIC</b>               | 304.18        |
| <b>log-likelihood ratio test</b> | 23.13 on 4 df |
| <b>-log2(p) of ll-ratio test</b> | 13.03         |

**Supplementary Table S2: Cox Proportional Hazard Model for Primary Tumors with  $\geq 30\%$  Cutoff**

Hazard ratios:

Female Sex 0.535655  
 WHO Grade 1.773531  
 Age at Resection 1.030576  
 CDKN2A Homo Del 4.220045

|                                               | coef  | exp(coef) | se(coef) | coef lower 95% | coef upper 95% | exp(coef) lower 95% | exp(coef) upper 95% | z     | p    | $-\log_2(p)$ |
|-----------------------------------------------|-------|-----------|----------|----------------|----------------|---------------------|---------------------|-------|------|--------------|
| <b>Sex</b>                                    | -0.62 | 0.54      | 0.34     | -1.29          | 0.04           | 0.28                | 1.04                | -1.85 | 0.06 | 3.95         |
| <b>Grade</b>                                  | 0.57  | 1.77      | 0.22     | 0.15           | 1.00           | 1.16                | 2.72                | 2.63  | 0.01 | 6.86         |
| <b>Age</b>                                    | 0.03  | 1.03      | 0.01     | 0.00           | 0.06           | 1.00                | 1.06                | 2.24  | 0.02 | 5.33         |
| <b>CDKN2A Homo Del <math>\geq 30\%</math></b> | 1.44  | 4.22      | 0.54     | 0.37           | 2.51           | 1.45                | 12.25               | 2.65  | 0.01 | 6.95         |

|                                                 |               |
|-------------------------------------------------|---------------|
| <b>Concordance</b>                              | 0.70          |
| <b>Partial AIC</b>                              | 307.00        |
| <b>log-likelihood ratio test</b>                | 20.31 on 4 df |
| <b><math>-\log_2(p)</math> of ll-ratio test</b> | 11.17         |

**Supplementary Table S3: Cox Proportional Hazard Model for First Recurrence Tumors with  $\geq 30\%$  Cutoff**

Hazard ratios:

Female Sex 0.605481  
 WHO Grade 2.638756  
 Age at Resection 0.995928  
 CDKN2A Homo Del 3.855558

|                                               | coef  | exp(coef) | se(coef) | coef lower 95% | coef upper 95% | exp(coef) lower 95% | exp(coef) upper 95% | z     | p    | -log2(p) |
|-----------------------------------------------|-------|-----------|----------|----------------|----------------|---------------------|---------------------|-------|------|----------|
| <b>Sex</b>                                    | -0.50 | 0.61      | 0.53     | -1.53          | 0.53           | 0.22                | 1.70                | -0.95 | 0.34 | 1.56     |
| <b>Grade</b>                                  | 0.97  | 2.64      | 0.35     | 0.29           | 1.66           | 1.33                | 5.23                | 2.78  | 0.01 | 7.51     |
| <b>Age</b>                                    | -0.00 | 1.00      | 0.02     | -0.05          | 0.04           | 0.96                | 1.04                | -0.19 | 0.85 | 0.24     |
| <b>CDKN2A Homo Del <math>\geq 30\%</math></b> | 1.35  | 3.86      | 0.56     | 0.26           | 2.44           | 1.29                | 11.51               | 2.42  | 0.02 | 6.00     |

|                                  |               |
|----------------------------------|---------------|
| <b>Concordance</b>               | 0.80          |
| <b>Partial AIC</b>               | 122.88        |
| <b>log-likelihood ratio test</b> | 23.36 on 4 df |
| <b>-log2(p) of ll-ratio test</b> | 13.19         |
